# Supplementary material
Source: publisher figshare collection journal article supplement (https://rs.figshare.com/ndownloader/files/20180615)
Supplement: Supplementary file 1 [file 20180615]

**Supplemental Table S2.** Mass (g) or Tarsus (mm) in relation to the factor Treatment (Control or Vitamins) and Day (1, 14 or 21). Factors in the final model have been highlighted in **bold**. Significant factors ( $p < 0.05$ ) have an \*. Random terms are included in all models, and their values are in *italic*. Non-significant interactions were excluded from the models when estimating coefficients of main effects.

|            | Fixed terms                |              |                       |                     |                   | Random terms      |              |
|------------|----------------------------|--------------|-----------------------|---------------------|-------------------|-------------------|--------------|
|            | Terms                      | Intercept    | Estimate (S.E.)       | F (d.f)             | p                 | Terms             | Variance     |
| Mass model | <b>Treatment</b>           | <b>1560</b>  | <b>-56.57 (70.09)</b> | <b>0.65 (119)</b>   | <b>0.421</b>      | <i>Chick/Nest</i> | <i>78883</i> |
|            | <b>Day (14)</b>            | <b>1560</b>  | <b>1378 (58.80)</b>   | <b>412 (95.64)</b>  | <b>&lt;0.001*</b> | <i>Nest</i>       | <i>74645</i> |
|            | <b>Day (21)</b>            | <b>1560</b>  | <b>1697 (60.08)</b>   | <b>412 (95.64)</b>  | <b>&lt;0.001*</b> | <i>Residual</i>   | <i>49684</i> |
|            | Rejected:<br>Treatment:Day | 1560         | 2.7 (92.69)           | 0.001 (85.28)       | 0.977             |                   |              |
| Size model | <b>Treatment</b>           | <b>90.87</b> | <b>0.09 (2.93)</b>    | <b>0.01 (114.8)</b> | <b>0.976</b>      | <i>Chick/Nest</i> | <i>120</i>   |
|            | <b>Day (14)</b>            | <b>90.87</b> | <b>69.13 (2.46)</b>   | <b>631 (92.99)</b>  | <b>&lt;0.001*</b> | <i>Nest</i>       | <i>230</i>   |
|            | <b>Day (21)</b>            | <b>90.87</b> | <b>89.09 (2.54)</b>   | <b>631 (92.99)</b>  | <b>&lt;0.001*</b> | <i>Residual</i>   | <i>87</i>    |
|            | Rejected:<br>Treatment:Day | 90.87        | -0.42 (3.96)          | 0.01 (83.28)        | 0.916             |                   |              |
